# Supplementary material for: Development of new multicomponent crystals of the antifungal drug tioconazole and the assessment of their biopharmaceutical attributes
Source: Royal Society of Chemistry journal article supplement (doi:10.1039/d3ce00948c), 2023-01-01
Supplement: d3ce00948c1.pdf [file d3ce00948c1.pdf]

## **Electronic Supplementary Information**

### **Development of New Multicomponent Crystals of the Antifungal Drug Tioconazole and the Assessment of their Biopharmaceutical Attributes**

**Avinash Madhesiya,<sup>a</sup> Sibananda G. Dash,<sup>a,c</sup> Princi Gupta,<sup>a</sup> Abdul Akhir,<sup>b</sup> Deepanshi Saxena,<sup>b</sup> Rahul Maitra,<sup>b</sup> Sidharth Chopra<sup>b</sup> and Tejender S. Thakur<sup>a,c,\*</sup>**

<sup>a</sup>Biochemistry and Structural Biology Division, CSIR-Central Drug Research Institute, Lucknow 226 031 INDIA

<sup>b</sup>Molecular Microbiology and Immunology Division, CSIR-Central Drug Research Institute, Lucknow 226 031 INDIA

<sup>c</sup>Academy of Scientific and Innovative Research (AcSIR), Ghaziabad 201 002, INDIA

**E-mail:** [tejender.thakur@cdri.res.in](mailto:tejender.thakur@cdri.res.in)

#### **Table of Contents**

| <b>Sr. No.</b> | <b>Description</b>                                                                | <b>Page No.</b> |
|----------------|-----------------------------------------------------------------------------------|-----------------|
| 1              | Cambridge structural database (CSD) analysis                                      | S2              |
| 2              | Primary site-pair interaction energy differences obtained for potential coformers | S3              |
| 3              | Secondary site-pair interaction energy differences for potential coformers        | S4              |
| 4              | Optimized geometry of homomeric and heteromeric molecular pairs                   | S5-S12          |
| 5              | Bulk phase assessment of solid forms                                              | S13             |
| 6              | Thermal analysis of solid forms                                                   | S14-S15         |
| 7              | Aqueous solubility determinations and solution phase stability studies            | S16-S18         |

Cambridge structural database (CSD version 5.44, April 2023) analysis of known multicomponent crystalline forms of azole antifungals in CSD.

Search Criteria:

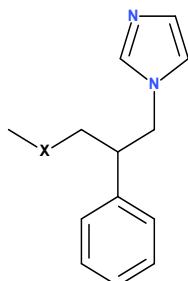

Scheme S1 'Azole scaffold' used in CSD search

- Structures with a given scaffold 'and' number of residues  $\geq 1$
- 3D coordinates determined
- Only organic

Table S1 Summary of Cambridge structural database search results.

| Azole drug/derivative   | Coformer                             | Refcode                         | Reference/DOI                                                                                       |
|-------------------------|--------------------------------------|---------------------------------|-----------------------------------------------------------------------------------------------------|
| Econazole               | HBr                                  | GAPSOF                          | 10.3891/acta.chem.scand.41a-0496                                                                    |
| Econazole               | Fumaric acid                         | TEJRIN                          | 10.1016/j.molstruc.2022.133183                                                                      |
| Econazole               | Maleic acid                          | TEJROT                          | 10.1016/j.molstruc.2022.133183                                                                      |
| Miconazole              | HNO <sub>3</sub>                     | ETEWUV                          | 10.1107/S1600536804003058                                                                           |
| Miconazole              | H <sub>2</sub> O                     | MICONZ,<br>MICONZ01<br>MICONZ02 | 10.1002/bscb.19790880501 10.1039/D1CP00956G<br>10.1107/S2053229622004909<br>10.1021/acs.cgd.2c00112 |
| Miconazole              | C <sub>2</sub> H <sub>5</sub> OH     | PAVQAI<br>PAVPOV<br>PAVPOV01    | 10.1021/acs.cgd.2c00112<br>10.1107/S2053229622004909                                                |
| Miconazole              | CH <sub>3</sub> OH                   | PAVPUB                          | 10.1021/acs.cgd.2c00112                                                                             |
| Miconazole              | H <sub>2</sub> O <sub>2</sub>        | UDUROD                          | 10.1039/C8CC04530E                                                                                  |
| Miconazole              | CH <sub>3</sub> SO <sub>4</sub>      | WUFJEP                          | 10.1021/acs.molpharmaceut.7b00694                                                                   |
| Miconazole              | Succinic acid                        | EVATAZ                          | 10.1039/D1CP00956G                                                                                  |
| Miconazole              | Fumaric acid                         | EVATED                          | 10.1039/D1CP00956G                                                                                  |
| Miconazole              | Fumaric acid                         | EVATIH                          | 10.1039/D1CP00956G                                                                                  |
| Miconazole              | Adipic acid                          | EVATON                          | 10.1039/D1CP00956G                                                                                  |
| Miconazole derivative   | HCl                                  | TONTEY                          | 10.1016/j.ejmech.2019.06.083                                                                        |
| Ketoconazole metabolite | HCl                                  | CUTDIH                          | 10.1016/j.molstruc.2020.128737                                                                      |
| Ketoconazole epimer     | CH <sub>3</sub> OH                   | MEBJOT                          | 10.1107/S1600536805041048                                                                           |
| Ketoconazole            | Oxalic acid                          | YINVUO                          | 10.1021/cg400638g                                                                                   |
| Ketoconazole            | Fumaric acid                         | YINWAV                          | 10.1021/cg400638g                                                                                   |
| Ketoconazole            | Succinic acid                        | YINWEZ                          | 10.1021/cg400638g                                                                                   |
| Ketoconazole            | Hexanedioic acid                     | YINWID                          | 10.1021/cg400638g                                                                                   |
| Ketoconazole            | 2,4-dihydroxy benzoic acid           | RADXED                          | 10.1021/acs.cgd.0c01014                                                                             |
| Ketoconazole            | 2,5-dihydroxy benzoic acid           | RADXIH                          | 10.1021/acs.cgd.0c01014                                                                             |
| Ketoconazole            | 3,4-dihydroxy benzoic acid           | RADXON                          | 10.1021/acs.cgd.0c01014                                                                             |
| Ketoconazole            | 3,4,5-trihydroxy benzoic acid        | RAXXUT                          | 10.1021/acs.cgd.0c01014                                                                             |
| Ketoconazole            | 3-(4-hydroxyphenyl)prop-2-enoic acid | RADYAA                          | 10.1021/acs.cgd.0c01014                                                                             |
| Ketoconazole            | 4-aminobenzoic acid                  | IRIBET,<br>IRIBET01             | 10.1021/acs.molpharmaceut.9b01178                                                                   |
| Tioconazole             | Malonic acid                         | SAPBAQ                          | 10.1021/acs.cgd.1c01139                                                                             |
| Tioconazole             | Fumaric acid                         | SAPBEU                          | 10.1021/acs.cgd.1c01139                                                                             |
| Tioconazole             | DL-tartaric acid                     | SAPBIY                          | 10.1021/acs.cgd.1c01139                                                                             |
| Sulconazole             | HNO <sub>3</sub>                     | LINQII                          | Bull. Korean Chem. Soc. 1997, 18, 14                                                                |

**Table S2** Site pair interaction energy differences ( $\Delta E^1_{\text{SitePair}}$  in kJ/mol) obtained for tioconazole complexes with various coformers.

| Sr No.    | Coformer                            | $\Delta E^1_{\text{SitePair}}$ |
|-----------|-------------------------------------|--------------------------------|
| <b>1</b>  | <b>2-Chloro-4-nitrobenzoic acid</b> | <b>-14.30</b>                  |
| 2         | Salicylic acid                      | -13.30                         |
| 3         | 2,5-Dihydroxybenzoic acid           | -9.94                          |
| 4         | 2,4-Dihydroxybenzoic acid           | -9.89                          |
| 5         | Mandelic acid                       | -9.00                          |
| 6         | Isonicotinic acid                   | -8.90                          |
| 7         | Benzoic acid                        | -8.10                          |
| <b>8</b>  | <b>Nicotinic acid</b>               | <b>-7.29</b>                   |
| 9         | 4-Hydroxybenzoic acid               | -7.20                          |
| 10        | 4-Aminosalicylic acid               | -6.55                          |
| 11        | Hydroquinone                        | -5.64                          |
| 12        | Gallic acid                         | -5.20                          |
| <b>13</b> | <b>Fumaric acid</b>                 | <b>-5.10</b>                   |
| <b>14</b> | <b>Terephthalic acid</b>            | <b>-4.90</b>                   |
| 15        | Succinic acid                       | -4.00                          |
| <b>16</b> | <b>Malonic acid</b>                 | <b>-3.84</b>                   |
| <b>17</b> | <b>Oxalic acid</b>                  | <b>-3.80</b>                   |
| 18        | Salicylamide                        | -2.30                          |
| 19        | Caffeine                            | -2.20                          |
| 20        | 5-Fluorouracil                      | -2.20                          |
| 21        | 2-aminopyridine                     | -1.90                          |
| 22        | Maleic acid                         | -1.70                          |
| 23        | Malic acid                          | -1.40                          |
| 24        | Acetamide                           | -1.35                          |
| 25        | Adipic acid                         | -1.00                          |
| 26        | Picolinamide                        | -1.00                          |
| 27        | 2-Aminopyrimidine                   | -0.50                          |
| 28        | Ascorbic acid                       | -0.12                          |
| 29        | Urea                                | -0.10                          |
| 30        | Pyrazinamide                        | 0.60                           |
| 31        | 4-Aminobenzamide                    | 1.20                           |
| 32        | Nicotinamide                        | 1.30                           |
| 33        | 3,4-Dihydroxybenzoic acid           | 1.41                           |
| 34        | Isonicotinamide                     | 1.50                           |
| 35        | Glutaric acid                       | 1.80                           |
| 36        | Citric acid                         | 2.00                           |
| <b>37</b> | <b>Tartaric acid</b>                | <b>4.20</b>                    |
| 38        | Benzamide                           | 4.90                           |
| 39        | <i>trans</i> -Aconitic acid         | 6.25                           |
| 40        | Mucic acid                          | 10.80                          |

# Multicomponent crystals observed in the experimental screening are boldfaced.

**Table S3** The secondary site pair interaction energy differences ( $\Delta E^2_{\text{SitePair}}$  in  $\text{kJ mol}^{-1}$ ) for potential cofomers.

| Sr No.    | Cofomer#                            | $E^2_{\text{sitepair}}$<br>(Homo pair) | $E^2_{\text{sitepair}}$<br>(Hetero pair) | $\Delta E^2_{\text{sitepair}}$<br>(Hetero-Homo) |
|-----------|-------------------------------------|----------------------------------------|------------------------------------------|-------------------------------------------------|
| <b>1</b>  | <b>2-Chloro-4-nitrobenzoic acid</b> | <b>-13.00</b>                          | <b>-17.50</b>                            | <b>-4.50</b>                                    |
| 2         | Salicylic acid                      | -12.47                                 | -19.80                                   | -7.33                                           |
| 3         | 2,5-Dihydroxybenzoic acid           | -30.97                                 | -30.90                                   | 0.07                                            |
| 4         | 2,4-Dihydroxybenzoic acid           | -27.80                                 | -28.40                                   | -0.60                                           |
| 5         | Mandelic acid                       | -44.28                                 | -39.80                                   | 4.48                                            |
| 6         | Isonicotinic acid                   | -40.50                                 | -18.40                                   | 22.10                                           |
| 7         | Benzoic acid                        | -7.53                                  | -21.20                                   | -13.67                                          |
| <b>8</b>  | <b>Nicotinic acid</b>               | <b>-39.02</b>                          | <b>-18.50</b>                            | <b>20.52</b>                                    |
| 9         | 4-hydroxybenzoic acid               | -28.20                                 | -35.30                                   | -7.10                                           |
| 10        | 4-aminosalicylic acid               | -25.40                                 | -26.90                                   | -1.50                                           |
| 11        | Hydroquinone                        | -42.90                                 | -36.30                                   | 6.60                                            |
| 12        | Gallic acid                         | -35.82                                 | -49.60                                   | -13.78                                          |
| <b>13</b> | <b>Fumaric acid</b>                 | <b>-37.61</b>                          | <b>-33.80</b>                            | <b>3.81</b>                                     |
| <b>14</b> | <b>Terephthalic acid</b>            | <b>-35.85</b>                          | <b>-33.80</b>                            | <b>2.05</b>                                     |
| 15        | Succinic acid                       | -34.98                                 | -34.80                                   | 0.18                                            |
| <b>16</b> | <b>Malonic acid</b>                 | <b>-39.15</b>                          | <b>-35.40</b>                            | <b>3.75</b>                                     |
| <b>17</b> | <b>Oxalic acid</b>                  | <b>-43.92</b>                          | <b>-50.80</b>                            | <b>-6.88</b>                                    |
| 18        | Salicylamide                        | -28.81                                 | -26.90                                   | 1.91                                            |
| 19        | Caffeine                            | -25.97                                 | -25.40                                   | 0.57                                            |
| 20        | 5-Fluorouracil                      | -57.80                                 | -43.70                                   | 14.10                                           |
| 21        | 2-aminopyridine                     | -18.30                                 | -21.90                                   | -3.60                                           |
| 22        | Maleic acid                         | -77.04                                 | -43.10                                   | 33.94                                           |
| 23        | Malic acid                          | -35.62                                 | -37.70                                   | -2.08                                           |
| 24        | Acetamide                           | -38.60                                 | -31.00                                   | 7.60                                            |
| 25        | Adipic acid                         | -38.20                                 | -37.70                                   | 0.50                                            |
| 26        | Picolinamide                        | -58.84                                 | -14.50                                   | 44.34                                           |
| 27        | 2-Aminopyrimidine                   | -23.04                                 | -20.80                                   | 2.24                                            |
| 28        | L-Ascorbic acid                     | -57.10                                 | -48.00                                   | 9.10                                            |
| 29        | Urea                                | -70.60                                 | -32.80                                   | 37.80                                           |
| 30        | Pyrazinamide                        | -19.94                                 | -23.10                                   | -3.16                                           |
| 31        | 4-Aminobenzamide                    | -38.33                                 | -34.20                                   | 4.13                                            |
| 32        | Nicotinamide                        | -33.53                                 | -31.20                                   | 2.33                                            |
| 33        | 3,4-Dihydroxybenzoic acid           | -38.60                                 | -33.80                                   | 4.80                                            |
| 34        | Isonicotinamide                     | -37.99                                 | -33.10                                   | 4.89                                            |
| 35        | Glutaric acid                       | -42.04                                 | -42.10                                   | -0.06                                           |
| 36        | Citric acid                         | -43.94                                 | -58.10                                   | -14.16                                          |
| <b>37</b> | <b>Tartaric acid</b>                | <b>-60.96</b>                          | <b>-75.40</b>                            | <b>-14.44</b>                                   |
| 38        | Benzamide                           | -31.95                                 | -27.00                                   | 4.95                                            |
| 39        | <i>trans</i> -Acotinic acid         | -36.46                                 | -47.60                                   | -11.14                                          |
| 40        | Mucic acid                          | -60.97                                 | -50.10                                   | 10.87                                           |
| 41        | Tioconazole                         | -13.21                                 | -13.21                                   | 0.00                                            |

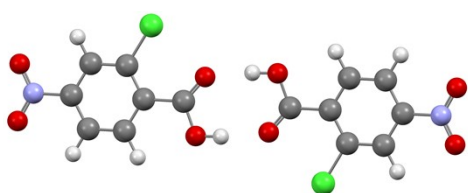

2-Chloro-4-nitrobenzoic acid (CNBA)

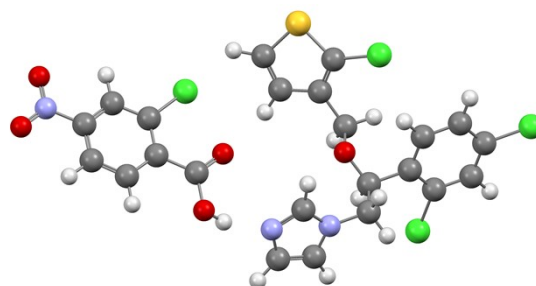

TCZ-CNBA

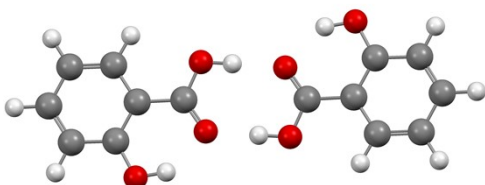

Salicylic acid

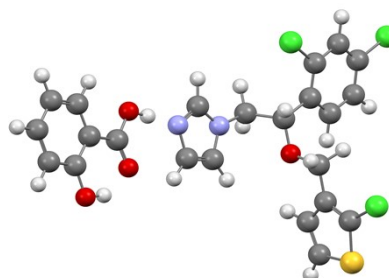

TCZ-Salicylic acid

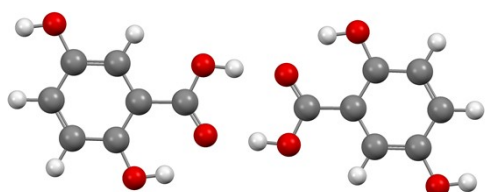

2,5-Dihydroxybenzoic acid (25DHBA)

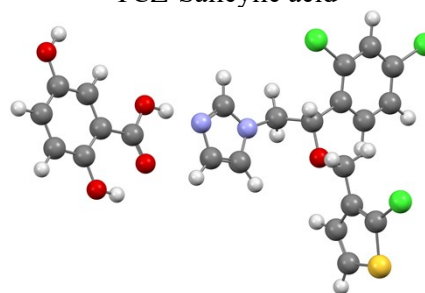

TCZ-25DHBA

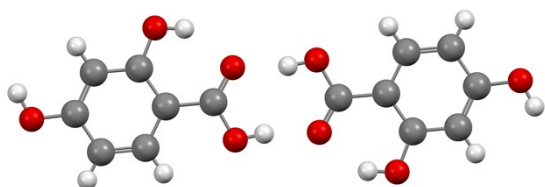

2,4-Dihydroxybenzoic acid (24DHBA)

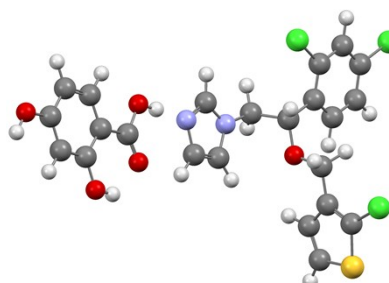

TCZ-24DHBA

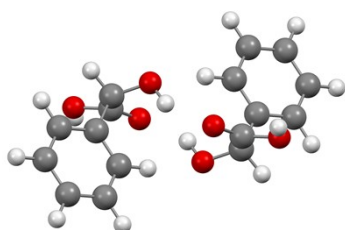

Mandelic Acid

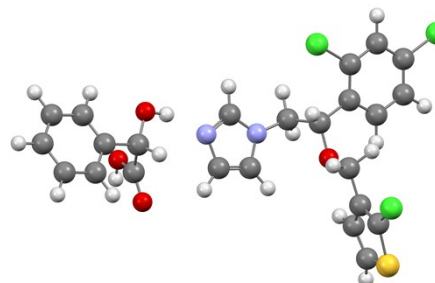

TCZ-Mandelic Acid

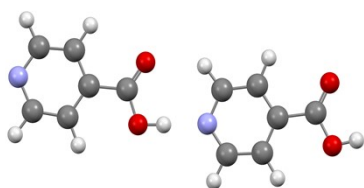

Isonicotinic acid

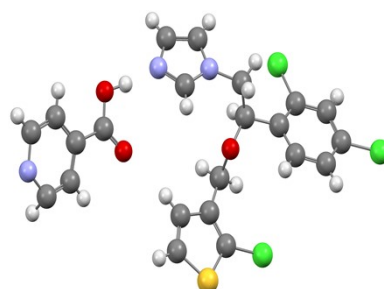

TCZ-Isonicotinic acid

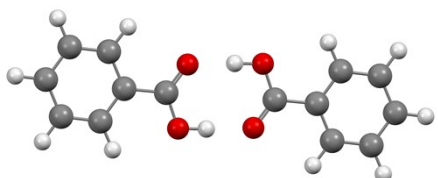

Benzoic acid

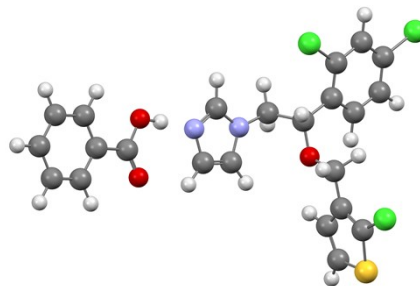

TCZ-Benzoic acid

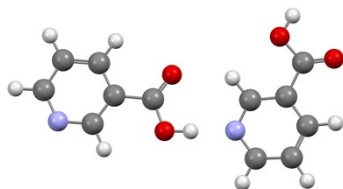

Nicotinic acid

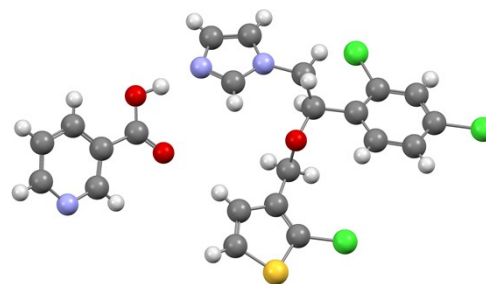

TCZ-Nicotinic acid

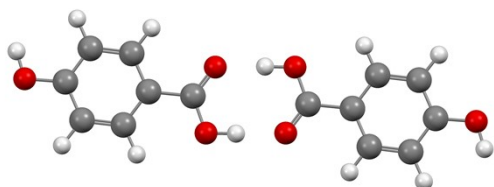

4-Hydroxybenzoic acid

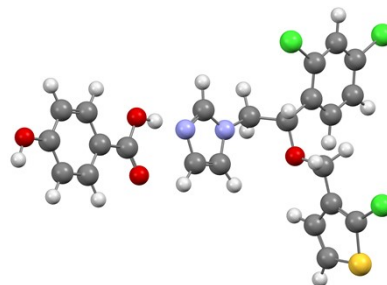

TCZ-4-Hydroxybenzoic acid

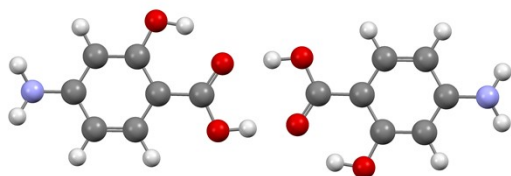

4-Aminosalicylic acid

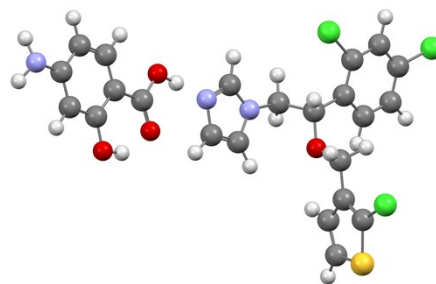

TCZ-4-Aminosalicylic acid

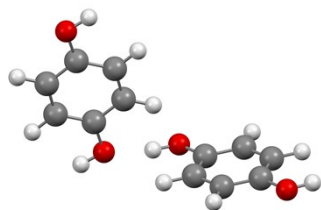

Hydroquinone

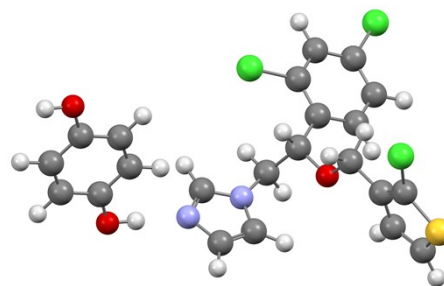

TCZ-Hydroquinone

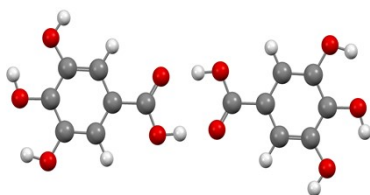

Gallic acid

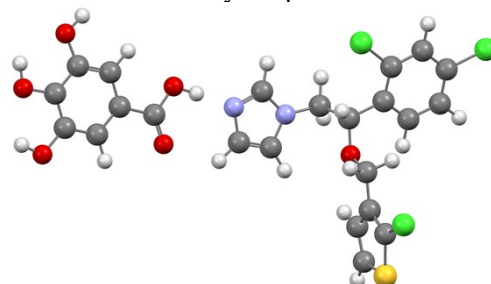

TCZ-Gallic acid

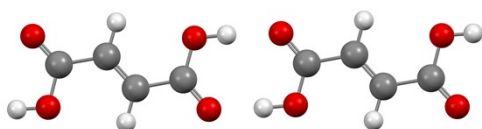

Fumaric acid

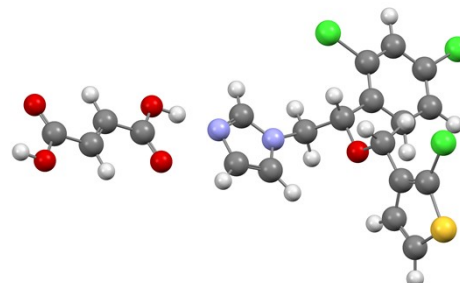

TCZ-Fumaric acid

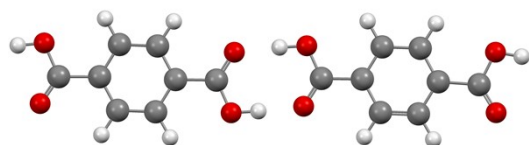

Terephthalic acid

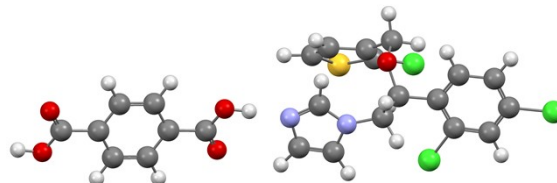

TCZ-Terephthalic acid

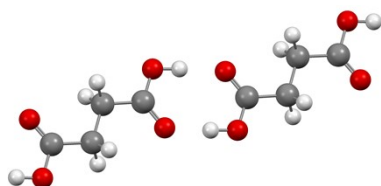

Succinic acid

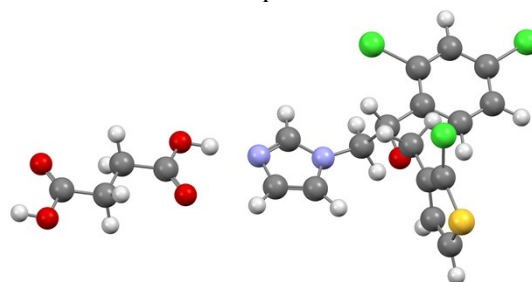

TCZ-Succinic acid

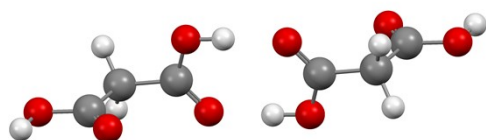

Malonic acid

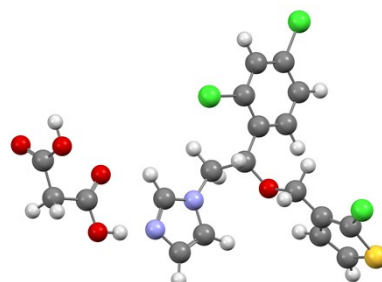

TCZ-Malonic acid

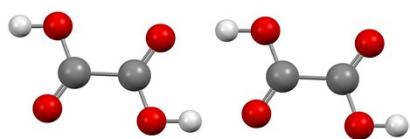

Oxalic acid

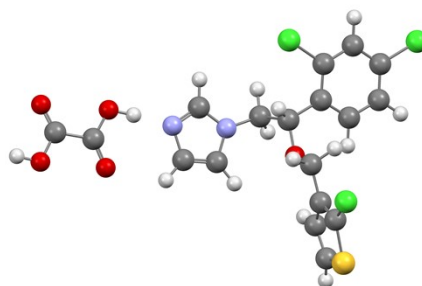

TCZ-Oxalic acid

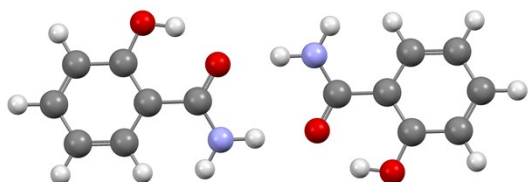

Salicylamide

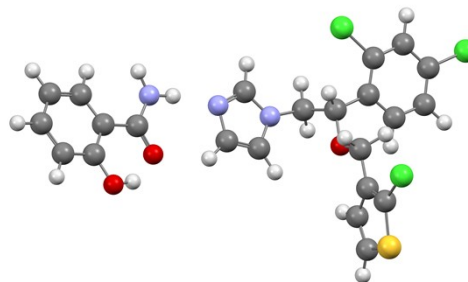

TCZ-Salicylamide

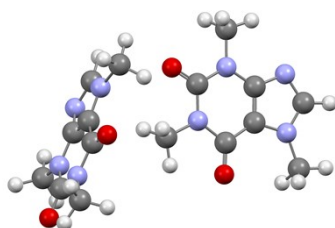

Caffeine

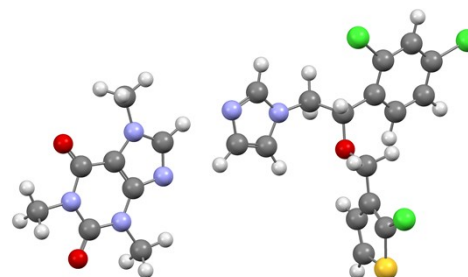

TCZ-Caffeine

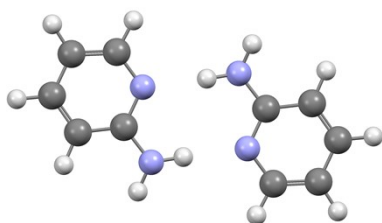

2-Aminopyridine

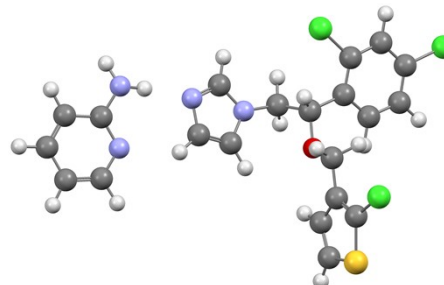

TCZ-2-Aminopyridine

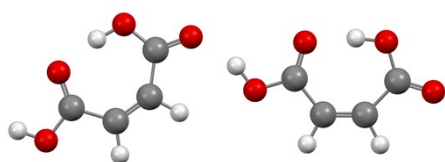

Maleic acid

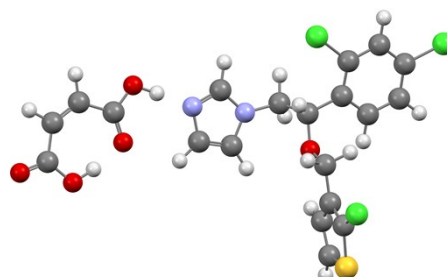

TCZ-Maleic acid



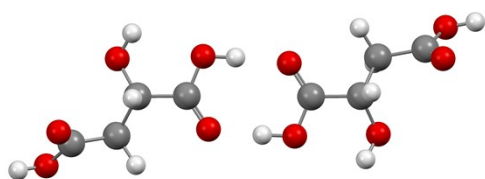

Malic acid

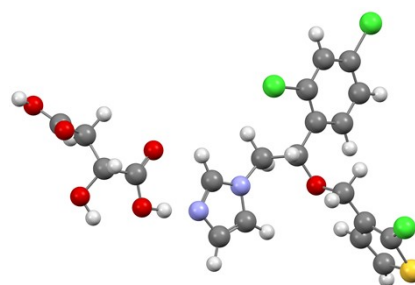

TCZ-malic acid

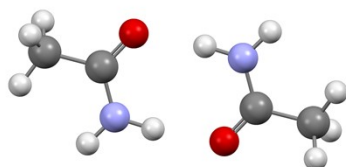

Acetamide

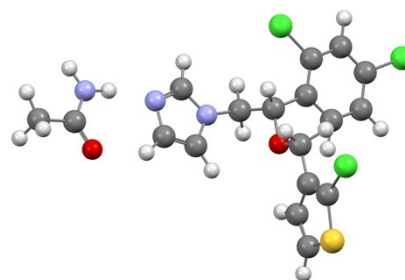

TCZ-Acetamide

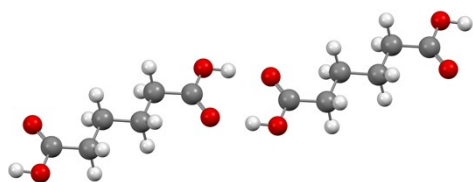

Adipic acid

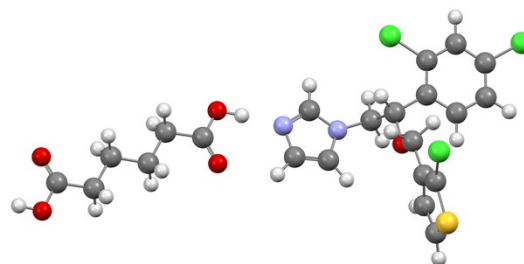

TCZ-Adipic acid

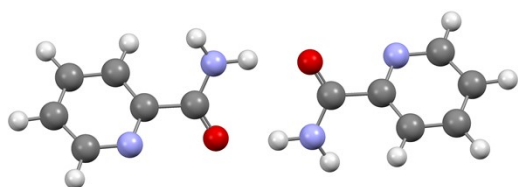

Picolinamide

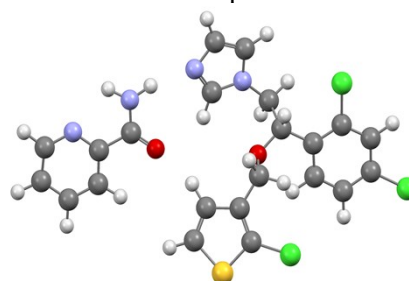

TCZ-Picolinamide

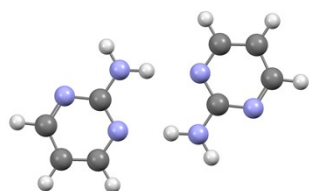

2-Aminopyrimidine

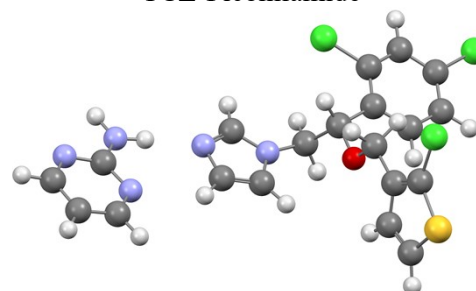

TCZ-2-Aminopyrimidine

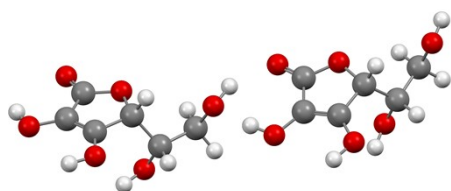

Ascorbic acid

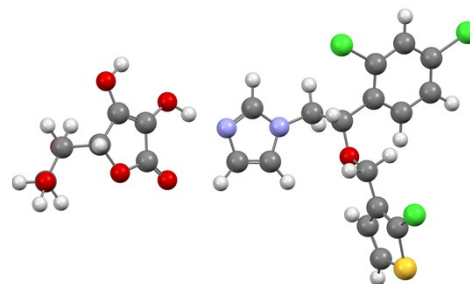

TCZ-Ascorbic acid

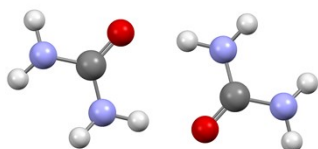

Urea

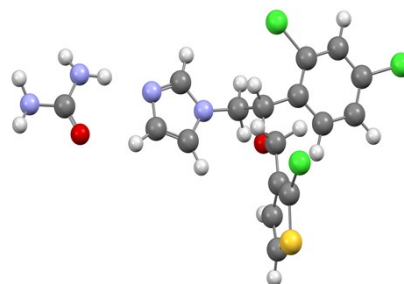

TCZ-Urea

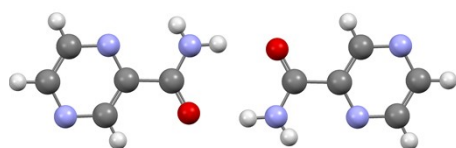

Pyrazinamide

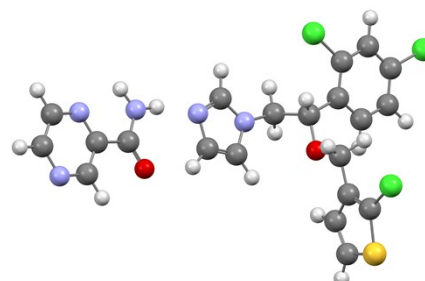

TCZ-Pyrazinamide

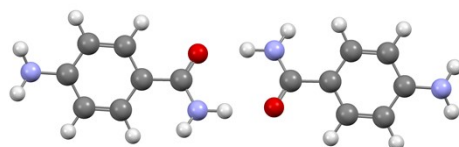

4-Aminobenzamide

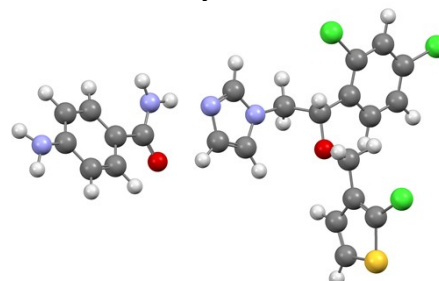

TCZ-4-Aminobenzamide

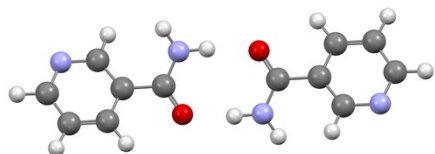

Nicotinamide

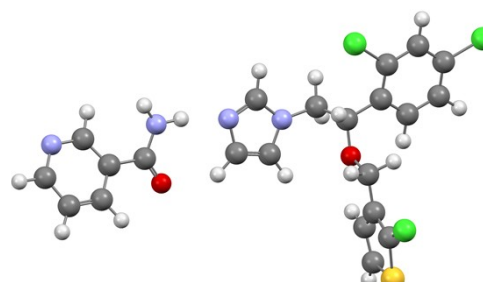

TCZ-Nicotinamide

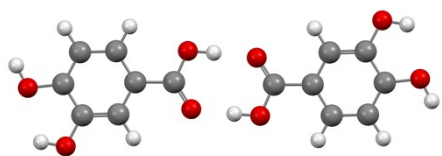

3,4-Dihydroxybenzoic acid (34DHBA))

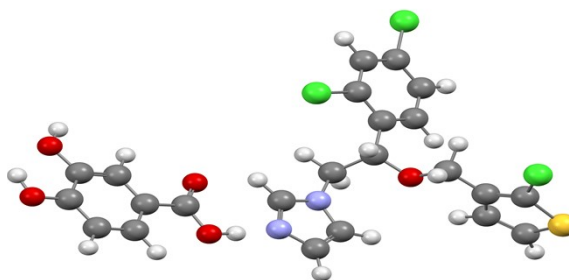

TCZ-34DHBA

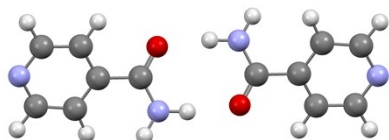

Isonicotinamide

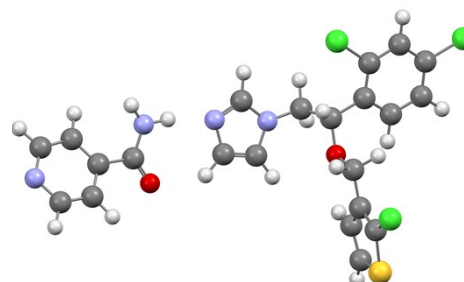

TCZ-Isonicotinamide

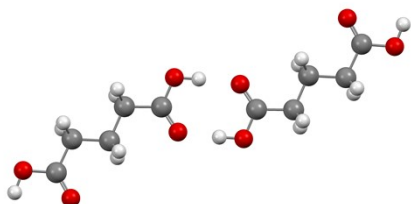

Glutaric acid

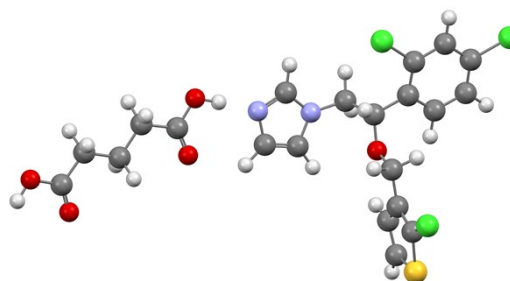

TCZ-Glutaric acid

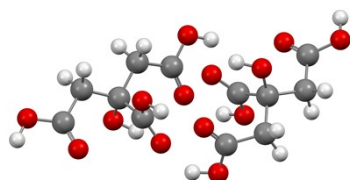

Citric acid

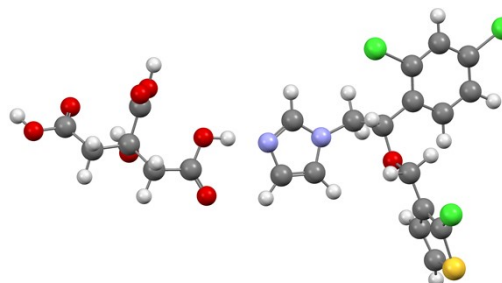

TCZ-Citric acid

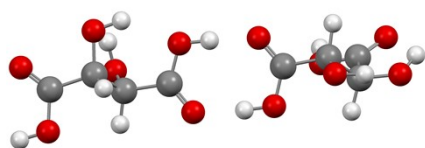

Tartaric acid

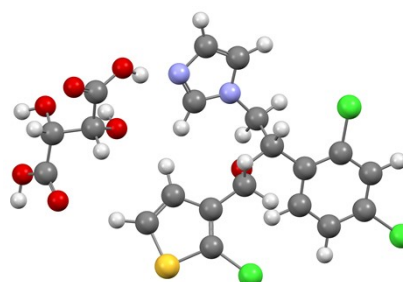

TCZ-Tartaric acid

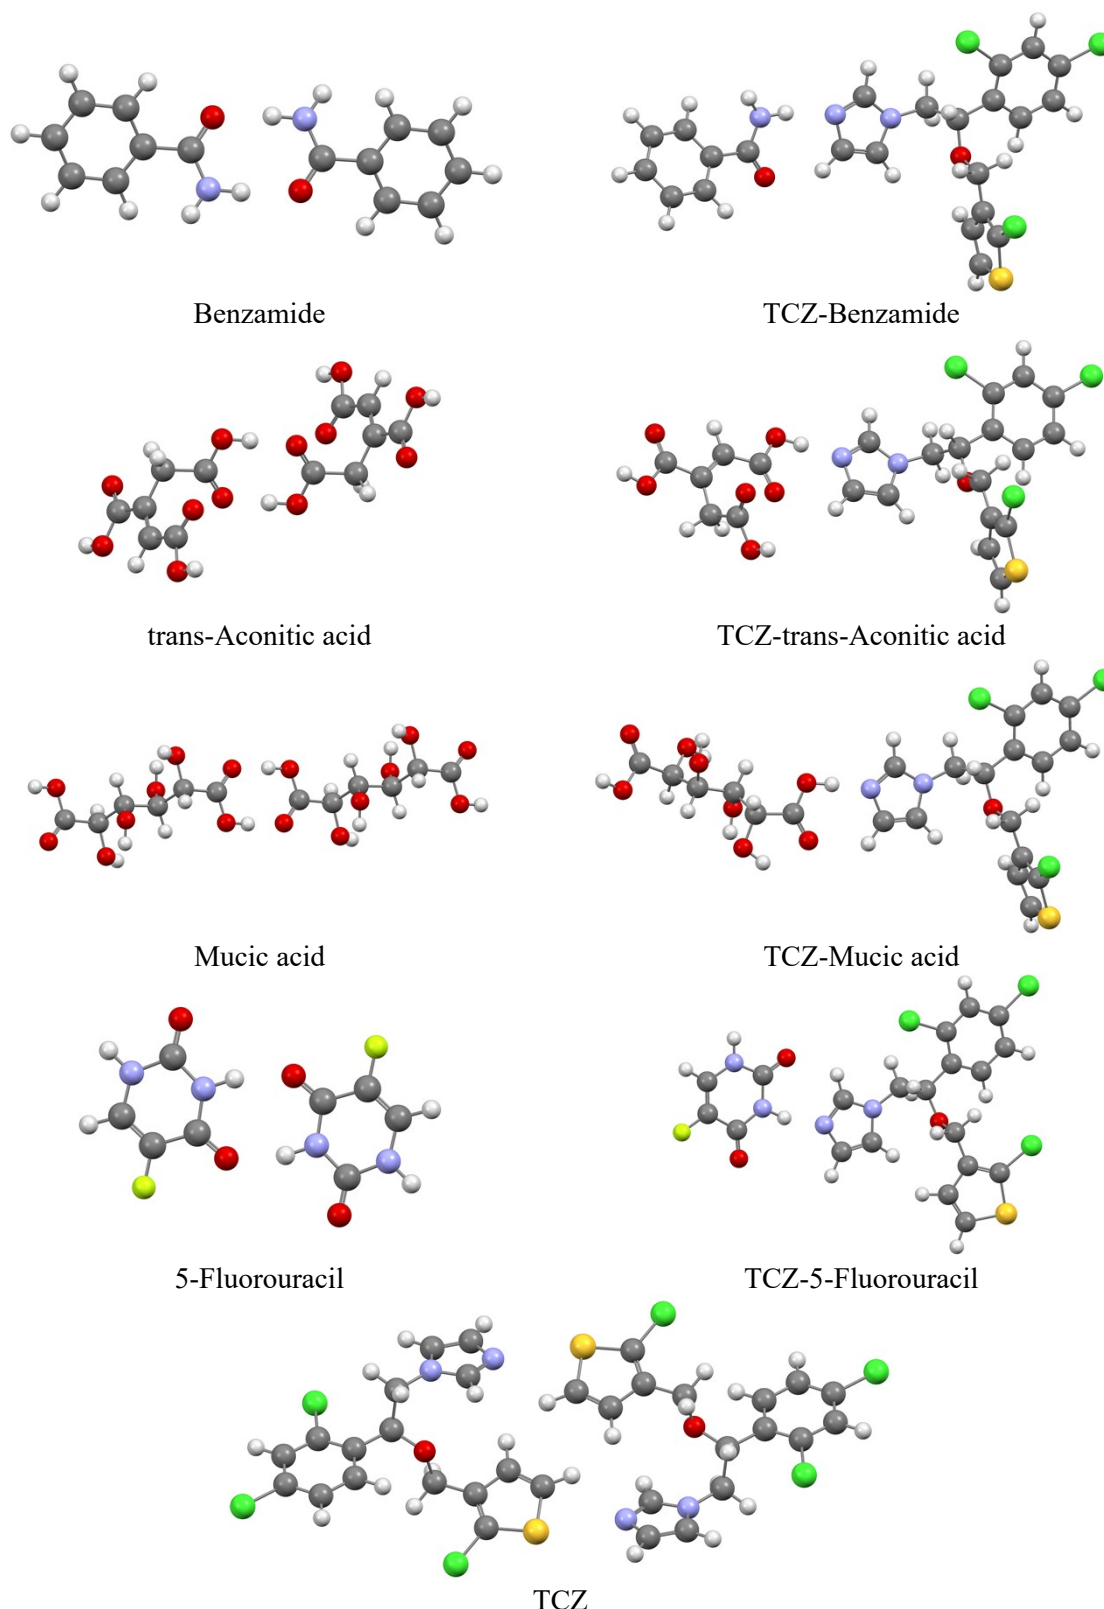

**Scheme S2** Optimized geometries of homomeric and heteromeric molecular pairs used in the secondary site-pair interaction energy computation.

**Bulk phase purity assessment of solid forms**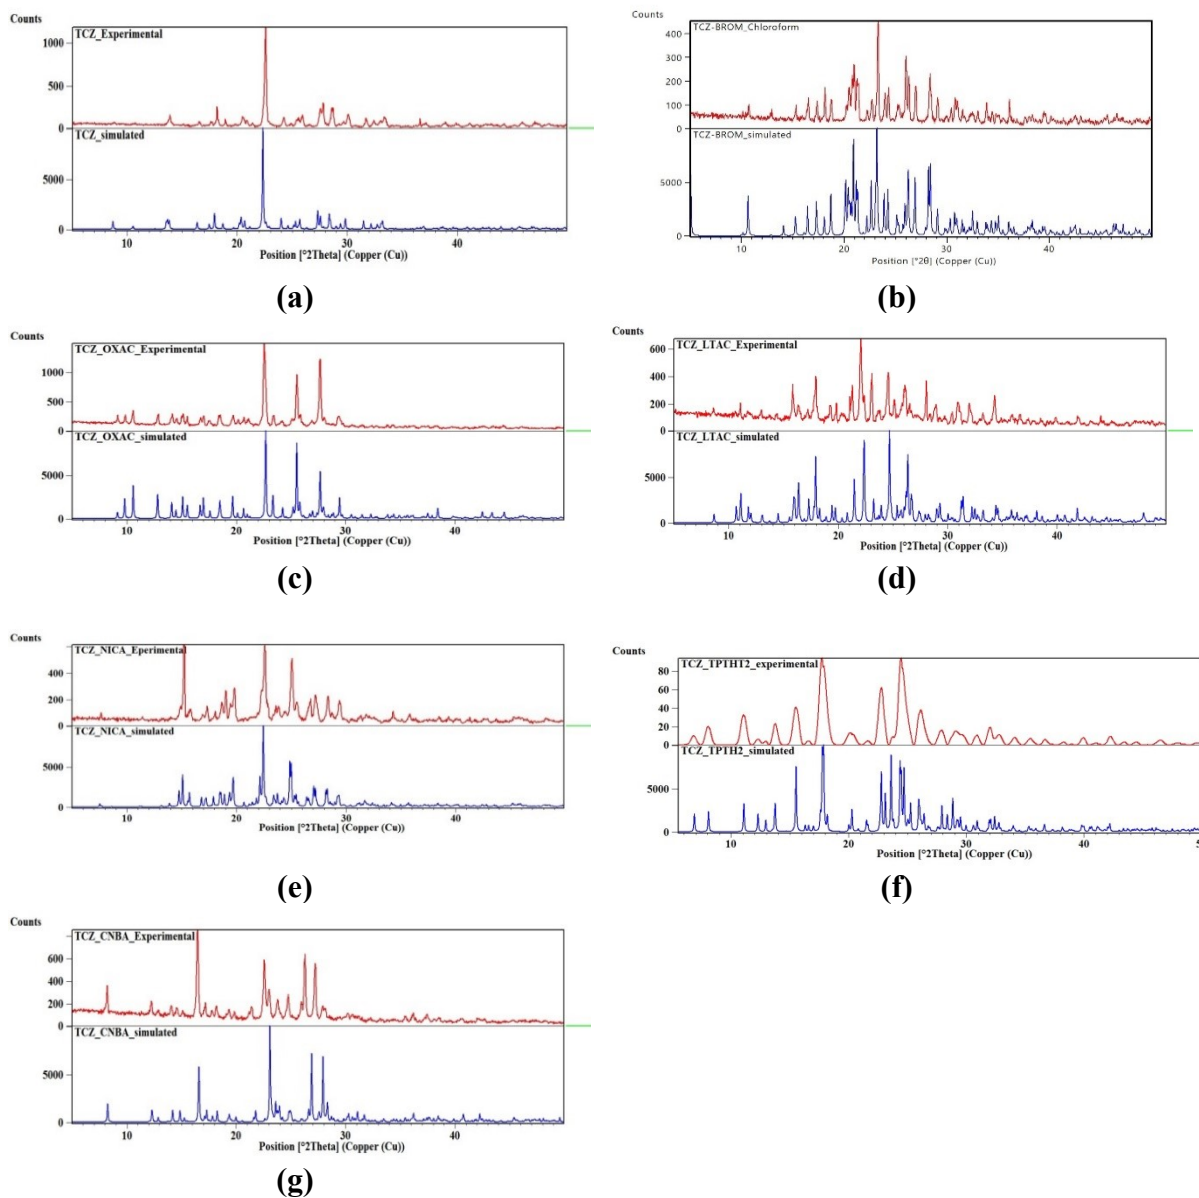

**Figure S1** Comparison of experimental and simulated PXRD patterns for solid-forms (a) TCZ, (b) TCZ-BROM, (c) TCZ-OXAC, (d) TCZ-LTAC, (e) TCZ-NICA, (f) TCZ-TPH2 and, (g) TCZ-CNBA.

## Thermal Analysis of Solid Forms

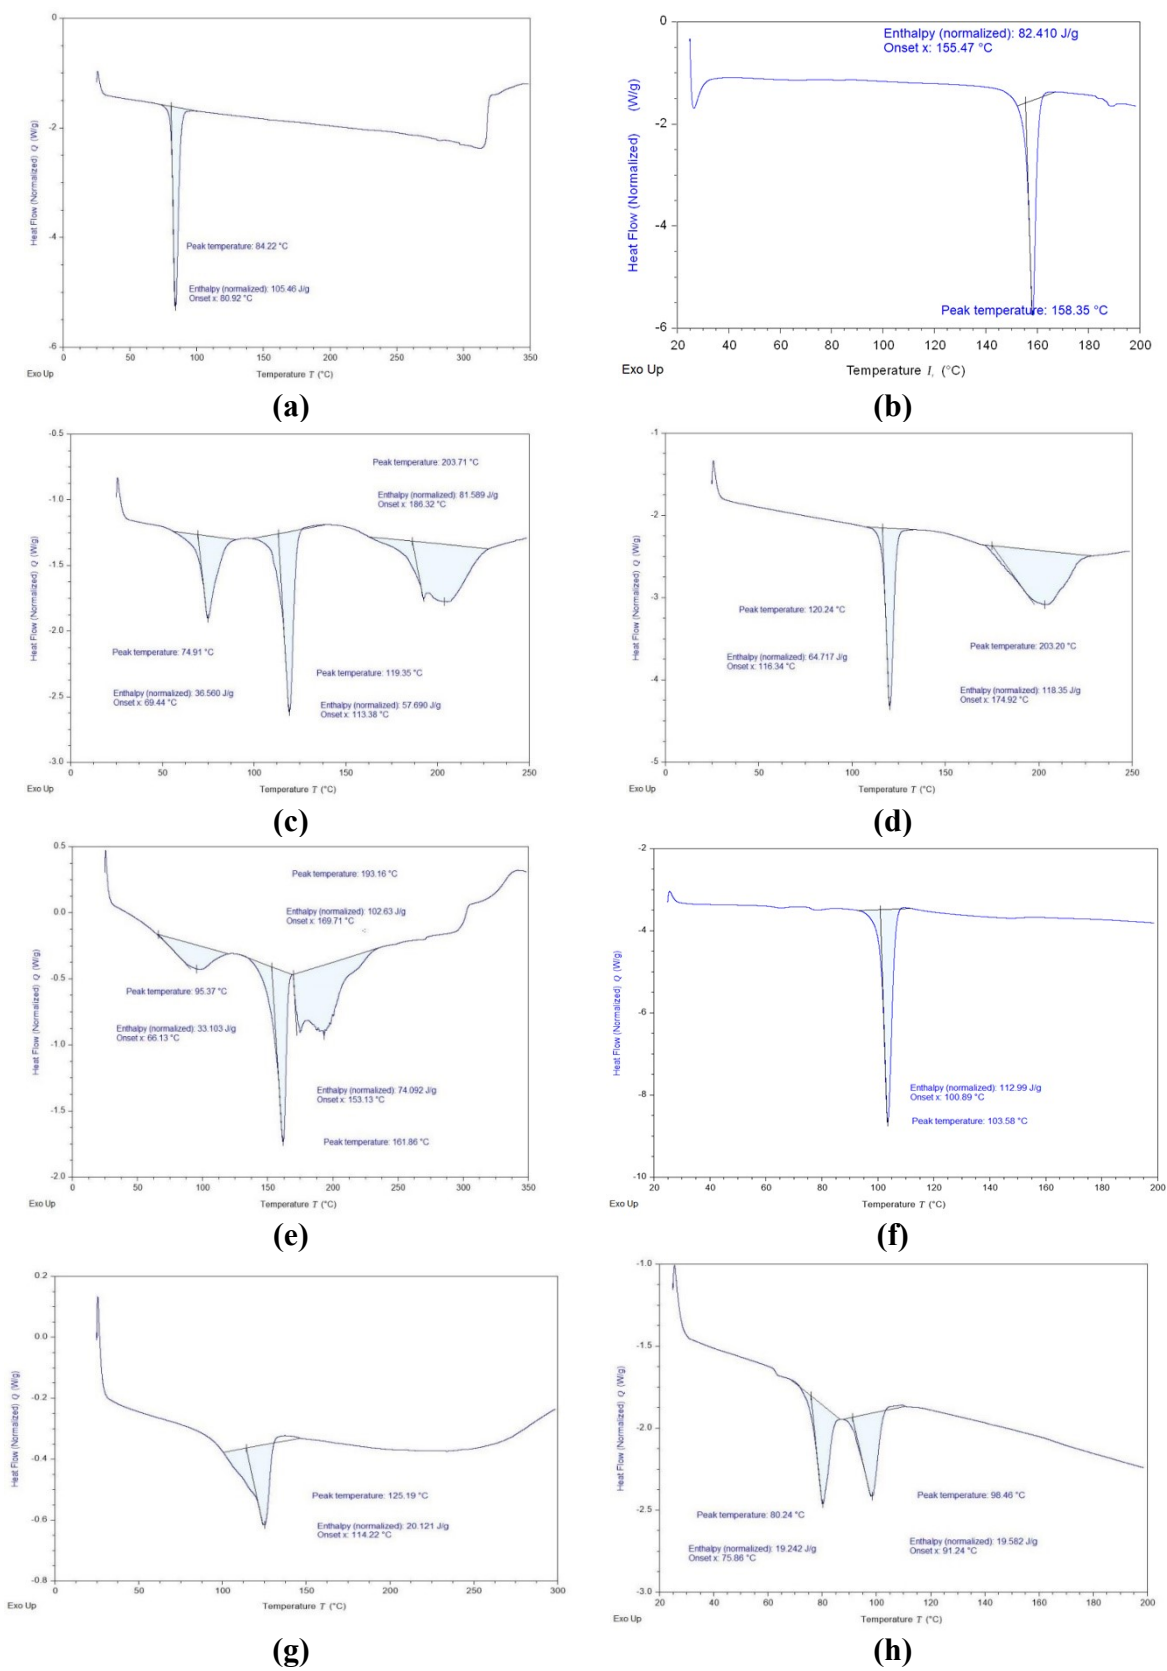

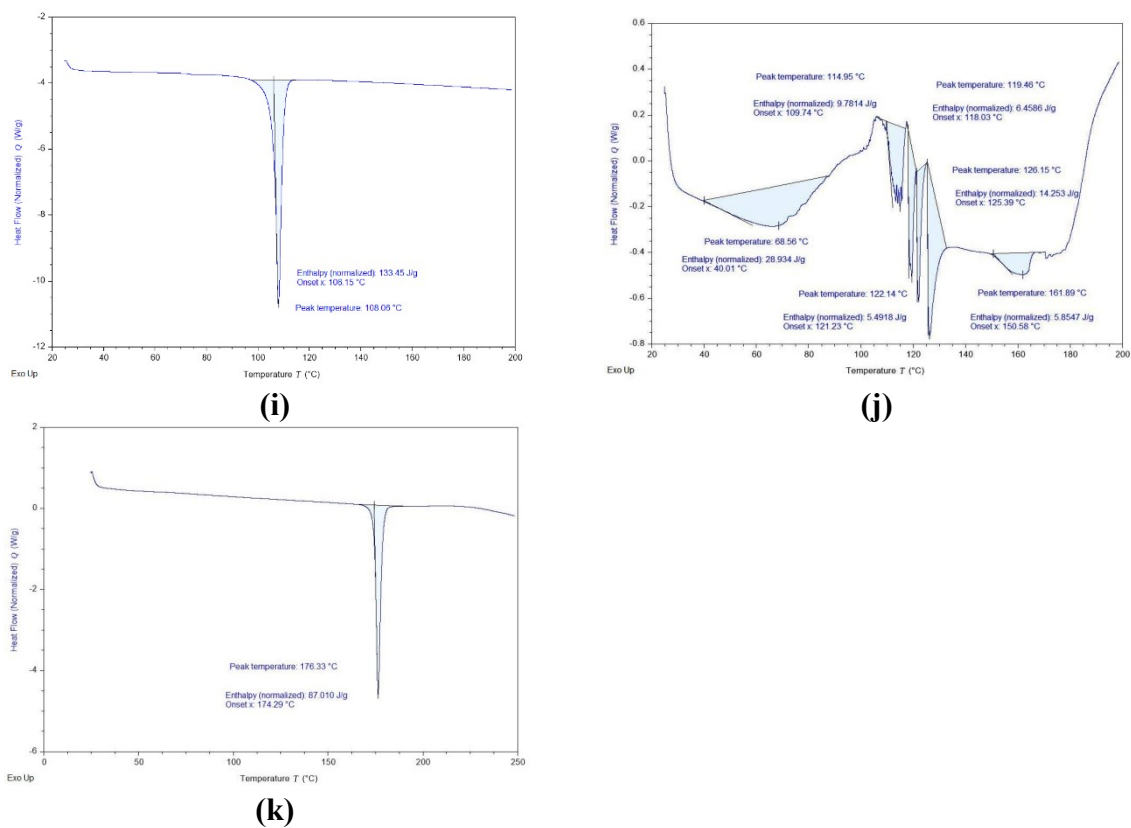

**Figure S2** DSC thermograms of (a) TCZ, (b) TCZ-OXAC, (c) TCZ-FUMH1, (d) TCZ-FUMH2, (e) TCZ-LTAC, (f) TCZ-NICA, (g) TCZ-PTSA, (h) TCZ-TPTH2 (i) TCZ-CNBA, (j) TCZ-SULF and (k) TCZ-BROM

## Aqueous Solubility Determinations of Solid Forms

### Phase Stability Assessments of Solid Forms in Aqueous Solutions

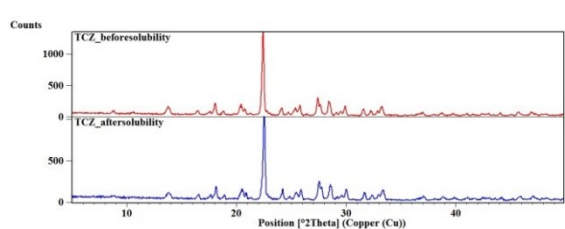

(a)

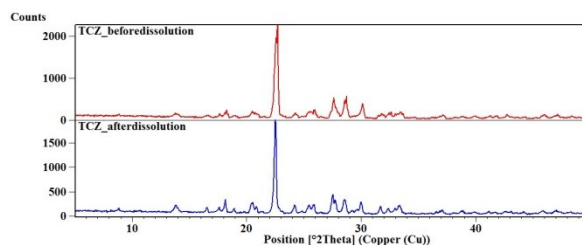

(b)

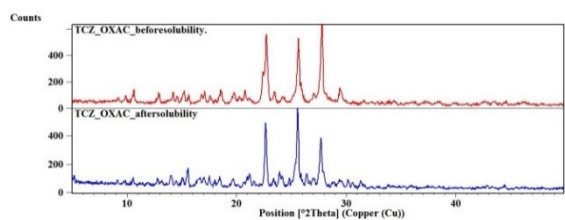

(c)

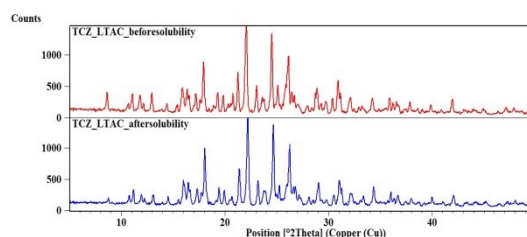

(d)

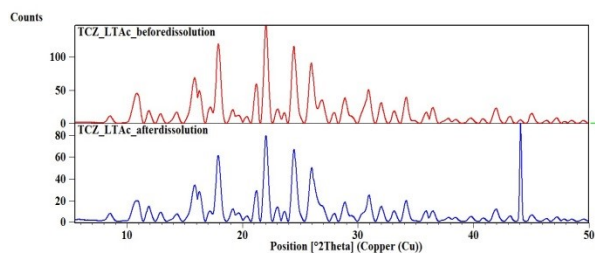

(e)

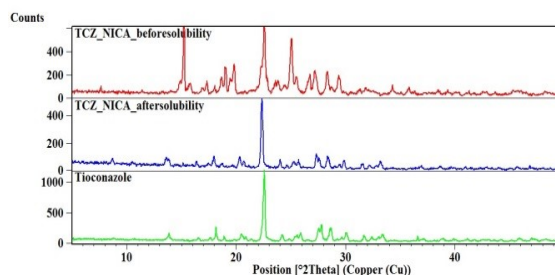

(f)

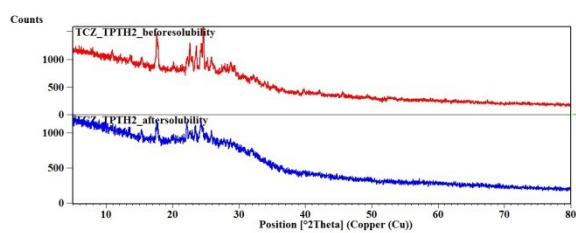

(g)

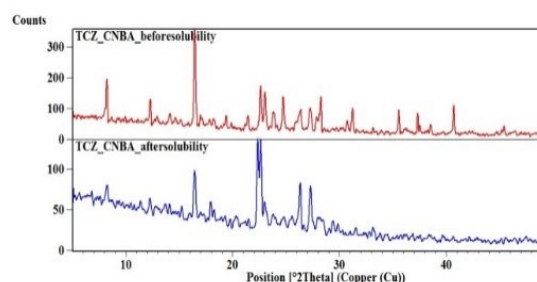

(h)

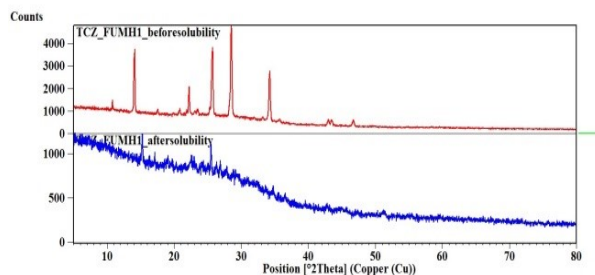

(i)

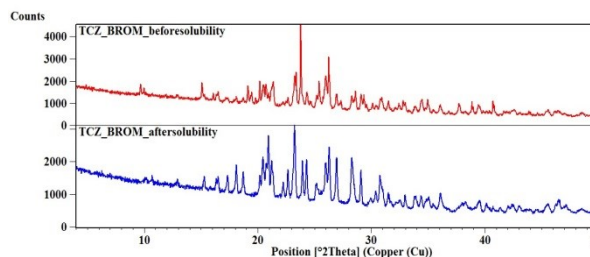

(j)



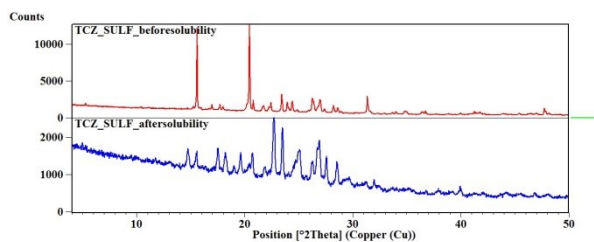

(k)

**Figure S3** Comparison of PXRD patterns TCZ solid forms with that of solid residue obtained after solubility measurement study (a) TCZ, (b) TCZ at pH 6.8 (c) TCZ-OXAC, (d) TCZ-LTAC, (e) TCZ-LTAC at pH6.8, (f) TCZ-TPTH2, (g) TCZ-NICA, (h) TCZ-CNBA, (i) TCZ-FUMH1, (j) TCZ-BROM and (k) TCZ-SULF

*UV calibration plots are drawn from the known concentration solutions*

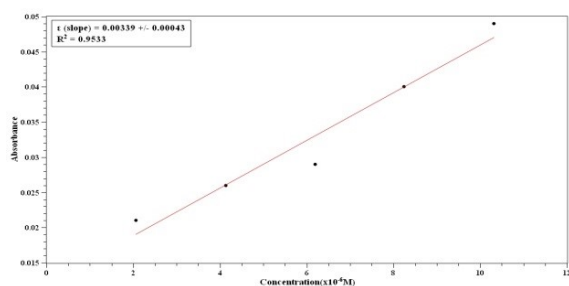

(a)

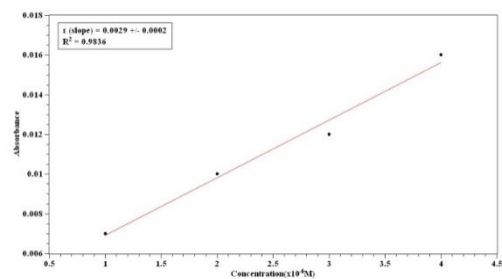

(b)

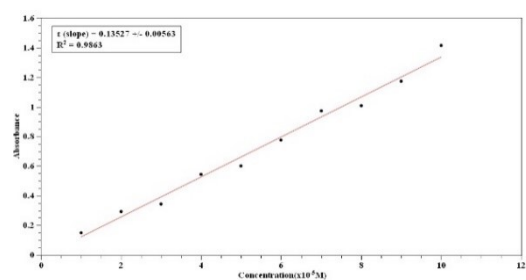

(c)

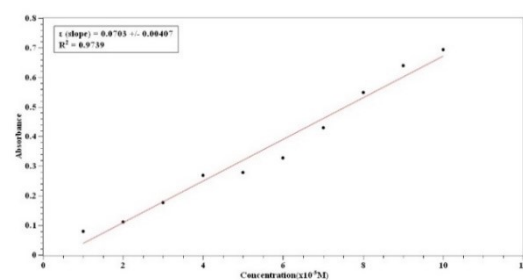

(d)

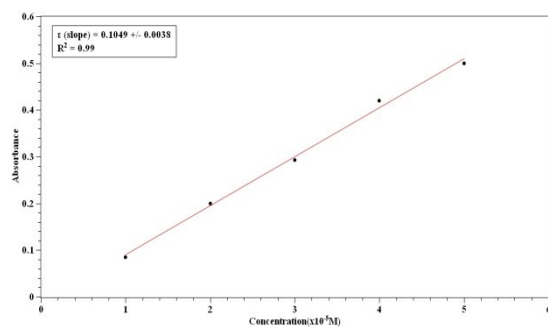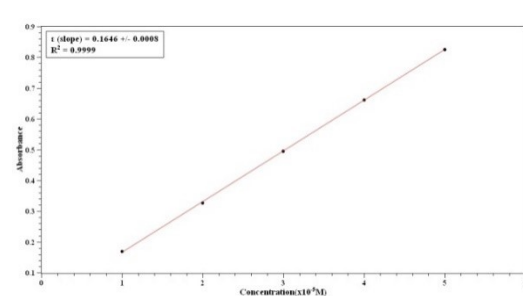

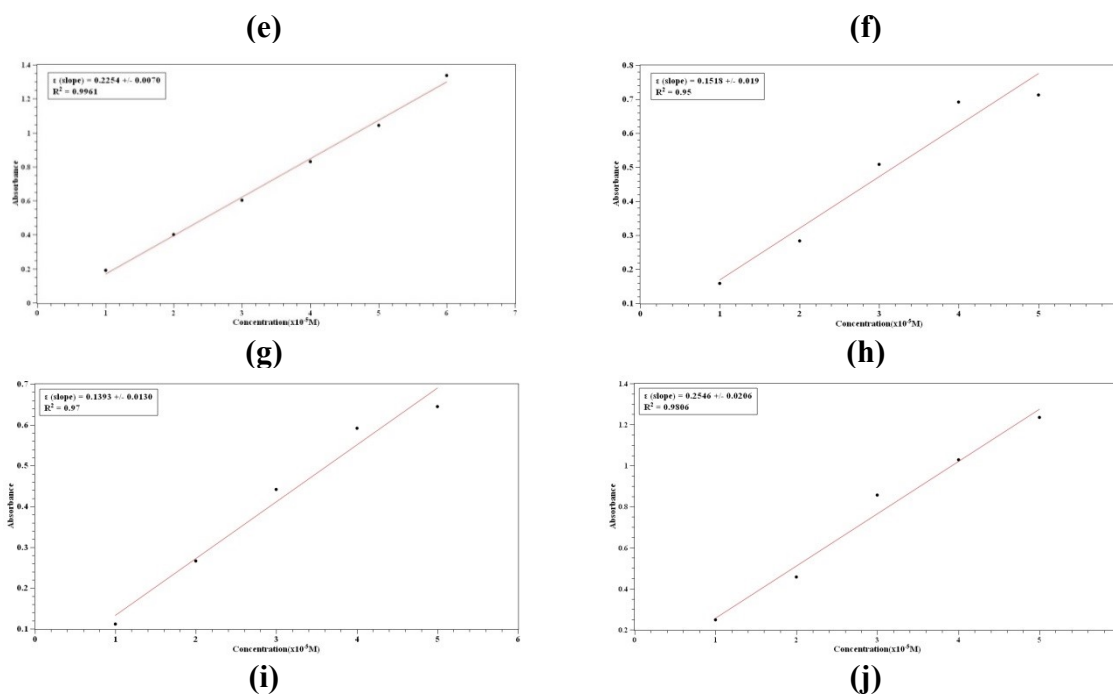

**Figure S4** UV calibration plots for solid-form (a) TCZ, (b) TCZ at pH 6.8 (c) TCZ-OXAC, (d) TCZ-LTAC, (e) TCZ-LTAC at pH 6.8, (f) TCZ-TPTH2, (g) TCZ-CNBA, (h) TCZ-BROM, (i) TCZ-SULF and (j) TCZ-FUMH1

**Table S4** Molecular extinction coefficients determined for the tioconazole solid forms in aqueous solutions by UV method.

| Solid-Form            | Molar extinction coefficient ( $\epsilon$ ) | Goodness-of-fit ( $R^2$ ) |
|-----------------------|---------------------------------------------|---------------------------|
| TCZ                   | 0.003±0.001                                 | 0.95                      |
| TCZ <sup>#</sup>      | 0.003±0.001                                 | 0.98                      |
| TCZ-OXAC              | 0.135±0.006                                 | 0.99                      |
| TCZ-LTAC              | 0.070±0.004                                 | 0.97                      |
| TCZ-LTAC <sup>#</sup> | 0.105±0.004                                 | 0.99                      |
| TCZ-TPTH2             | 0.165±0.001                                 | 0.99                      |
| TCZ-CNBA              | 0.225±0.007                                 | 0.99                      |
| TCZ-BROM              | 0.152±0.029                                 | 0.95                      |
| TCZ-SULF              | 0.139±0.013                                 | 0.97                      |
| TCZ-FUMH1             | 0.255±0.021                                 | 0.98                      |

<sup>#</sup>Determined in phosphate buffer at pH 6.8
